# Supplementary material for: Regional Citrate Anticoagulation and Systemic Anticoagulation during Pediatric Continuous Renal Replacement Therapy: A Systematic Literature Review
Source: MDPI journal article supplement (doi:10.3390/jcm11113121), 2022-05-31
Supplement: s1 [file s1]

# Supplemental Material

*Table S1 - Search strategy for PubMed Database*

((citrate OR heparin) AND (dialysis OR hemodialysis OR hemofiltration OR kidney replacement therapy OR hemodiafiltration OR continuous renal replacement therapy OR crrt) AND anticoagulation AND (pediatric OR children)) OR ((citrate OR heparin) AND (dialysis OR continuous renal replacement therapy OR crrt OR hemodialysis OR hemofiltration OR kidney replacement therapy OR hemodiafiltration) AND anticoagulation AND (allchild[Filter])).

*Table S2 – Search strategy for CINAHL Database*

(citrate OR heparin) AND (dialy\* OR hemodialy\* OR hemofiltrat\* OR "kidney replacement therapy" OR hemodiafiltrat\* OR "continuous renal replacement therapy" OR crrt) AND anticoagulat\* AND (pedia\* OR paedia\* OR child\*)

*Table S3 – Search strategy for EMBASE Database*

((citrate OR heparin) AND (dialysis OR hemodialysis OR hemofiltration OR 'kidney replacement therapy' OR hemodiafiltration OR 'continuous renal replacement therapy' OR crrt) AND anticoagulation AND (pediatric OR children)) OR ((citrate OR heparin) AND (dialysis OR 'continuous renal replacement therapy' OR crrt OR hemodialysis OR hemofiltration OR 'kidney replacement therapy' OR hemodiafiltration) AND anticoagulation AND ([newborn]/lim OR [infant]/lim OR [child]/lim OR [preschool]/lim OR [school]/lim OR [adolescent]/lim))

*Table S4 – Search strategy for Cochrane Database*

((citrate OR heparin) AND (dialysis OR hemodialysis OR hemofiltration OR "kidney replacement therapy" OR hemodiafiltration OR "continuous renal replacement therapy" OR crrt) AND anticoagulation AND (pediatric OR children))

Table s5 - Quality evaluation of observational studies according to STROBE reporting guidelines. (✓: described; ✗: not described)

| Source                   |    |                  |                      |                     |                 |                        |                          |                  |                               |                       |                       |
|--------------------------|----|------------------|----------------------|---------------------|-----------------|------------------------|--------------------------|------------------|-------------------------------|-----------------------|-----------------------|
| Item No                  |    | Chen et al. [11] | Buccione et al. [13] | Cortina et al. [14] | Sik et al. [15] | Kakajiwala et al. [16] | Miklaszewska et al. [17] | Rico et al. [18] | Raymakers-Janssen et al. [19] | Fernandez et al. [21] | Soltysiak et al. [22] |
| Title and abstract       | 1  | ✓                | ✓                    | ✓                   | ✓               | ✓                      | ✓                        | ✓                | ✗                             | ✓                     | ✓                     |
| Introduction             |    |                  |                      |                     |                 |                        |                          |                  |                               |                       |                       |
| Background/ rationale    | 2  | ✓                | ✓                    | ✓                   | ✓               | ✓                      | ✓                        | ✓                | ✓                             | ✓                     | ✓                     |
| Objectives               | 3  | ✓                | ✓                    | ✓                   | ✓               | ✓                      | ✓                        | ✓                | ✓                             | ✓                     | ✓                     |
| Methods                  |    |                  |                      |                     |                 |                        |                          |                  |                               |                       |                       |
| Study design             | 4  | ✓                | ✓                    | ✓                   | ✓               | ✓                      | ✓                        | ✓                | ✓                             | ✓                     | ✓                     |
| Setting                  | 5  | ✓                | ✓                    | ✓                   | ✓               | ✓                      | ✓                        | ✓                | ✓                             | ✗                     | ✓                     |
| Participants             | 6  | ✓                | ✓                    | ✓                   | ✓               | ✓                      | ✓                        | ✓                | ✓                             | ✓                     | ✓                     |
| Variables                | 7  | ✓                | ✓                    | ✓                   | ✓               | ✓                      | ✓                        | ✓                | ✓                             | ✓                     | ✓                     |
| Data source/ measurement | 8  | ✓                | ✓                    | ✓                   | ✓               | ✓                      | ✓                        | ✓                | ✓                             | ✓                     | ✓                     |
| Bias                     | 9  | ✗                | ✗                    | ✗                   | ✗               | ✗                      | ✗                        | ✗                | ✗                             | ✗                     | ✗                     |
| Study size               | 10 | ✓                | ✓                    | ✓                   | ✓               | ✓                      | ✓                        | ✓                | ✓                             | ✓                     | ✓                     |
| Quantitative variables   | 11 | ✓                | ✓                    | ✓                   | ✓               | ✓                      | ✓                        | ✓                | ✗                             | ✓                     | ✓                     |
| Statistical methods      | 12 | ✓                | ✓                    | ✓                   | ✓               | ✓                      | ✓                        | ✓                | ✓                             | ✓                     | ✓                     |
| Results                  |    |                  |                      |                     |                 |                        |                          |                  |                               |                       |                       |
| Participants             | 13 | ✓                | ✓                    | ✓                   | ✓               | ✓                      | ✓                        | ✓                | ✓                             | ✓                     | ✓                     |
| Descriptive data         | 14 | ✓                | ✓                    | ✓                   | ✓               | ✓                      | ✓                        | ✓                | ✓                             | ✓                     | ✓                     |
| Outcome data             | 15 | ✓                | ✓                    | ✓                   | ✓               | ✓                      | ✓                        | ✓                | ✓                             | ✓                     | ✓                     |
| Main results             | 16 | ✓                | ✓                    | ✓                   | ✓               | ✓                      | ✓                        | ✓                | ✓                             | ✓                     | ✓                     |
| Other analyses           | 17 | ✓                | ✓                    | ✓                   | ✓               | ✓                      | ✓                        | ✓                | ✓                             | ✓                     | ✓                     |
| Discussion               |    |                  |                      |                     |                 |                        |                          |                  |                               |                       |                       |
| Key Results              | 18 | ✓                | ✓                    | ✓                   | ✓               | ✓                      | ✓                        | ✓                | ✓                             | ✓                     | ✓                     |
| Limitations              | 19 | ✓                | ✓                    | ✓                   | ✓               | ✓                      | ✓                        | ✓                | ✓                             | ✓                     | ✗                     |
| Interpretation           | 20 | ✓                | ✓                    | ✓                   | ✓               | ✓                      | ✓                        | ✓                | ✓                             | ✓                     | ✓                     |
| Generalisability         | 21 | ✓                | ✓                    | ✓                   | ✓               | ✓                      | ✓                        | ✓                | ✓                             | ✓                     | ✓                     |
| Other information        |    |                  |                      |                     |                 |                        |                          |                  |                               |                       |                       |
| Funding                  | 22 | ✓                | ✓                    | ✗                   | ✓               | ✓                      | ✗                        | ✗                | ✗                             | ✗                     | ✗                     |

Table s6 - Quality evaluation of Crossover Trial study according to CONSORT reporting guidelines (✓: described; ✗: not described)

| Source                           |    |                    |
|----------------------------------|----|--------------------|
| Item No                          |    | Zaoral et al. [20] |
| Title and abstract               | 1a | ✗                  |
|                                  | 1b | ✓                  |
| <b>Introduction</b>              |    |                    |
| Background and objectives        | 2a | ✓                  |
|                                  | 2b | ✓                  |
| <b>Methods</b>                   |    |                    |
| Trial design                     | 3a | ✓                  |
|                                  | 3b | ✓                  |
| Participants                     | 4a | ✓                  |
|                                  | 4b | ✓                  |
| Interventions                    | 5  | ✓                  |
| Outcomes                         | 6a | ✓                  |
|                                  | 6b | ✗                  |
| Sample size                      | 7  | ✓                  |
| <b>Randomisation</b>             |    |                    |
| Sequence generation              | 8  | ✗                  |
| Allocation concealment mechanism | 9  | ✗                  |
| Implementation                   | 10 | ✗                  |
| Blinding                         | 11 | ✓                  |
| Statistical method               | 12 | ✓                  |
| <b>Results</b>                   |    |                    |
| Participants flow                | 13 | ✓                  |
| Recruitment                      | 14 | ✓                  |
| Baseline data                    | 15 | ✓                  |
| Numbers analysed                 | 16 | ✗                  |
| Outcomes and estimation          | 17 | ✓                  |
| Ancillary analyses               | 18 | ✓                  |
| Harms                            | 19 | ✗                  |
| <b>Discussion</b>                |    |                    |
| Limitations                      | 20 | ✓                  |
| Generalisability                 | 21 | ✓                  |
| Interpretation                   | 22 | ✓                  |
| <b>Other information</b>         |    |                    |
| Registration                     | 23 | ✗                  |
| Protocol                         | 24 | ✗                  |
| Funding                          | 25 | ✗                  |
